# Supplementary material for: In situ synthesized single-crystalline LiMn2O4 embedded in carbon nanotube films as free-standing cathodes for Li-ion batteries
Source: Royal Society of Chemistry journal article supplement (doi:10.1039/c5ra27480j), 2016-01-01
Supplement: c5ra27480j1.pdf [file c5ra27480j1.pdf]

## Supporting Information

### **In-situ synthesized single-crystalline $\text{LiMn}_2\text{O}_4$ embedded in carbon nanotube films as free-standing cathodes for Li-ion batteries**

Zhiyu Wang,<sup>ab</sup> Jianli Cheng,<sup>\*a</sup> Xiaodong Li,<sup>a</sup> Wei Ni,<sup>a</sup> Demao Yuan,<sup>a</sup> and Bin Wang,<sup>\*a</sup>

<sup>a</sup> *Institute of Chemical Materials, China Academy of Engineering Physics, Mianyang, Sichuan 621900, China. E-mail: binwang@caep.cn; edward.bwang@gmail.com; Fax: +86 816 2544*

426

<sup>b</sup> *College of Environmental Science and Engineering, Taiyuan University of Technology, Taiyuan 030024, China.*

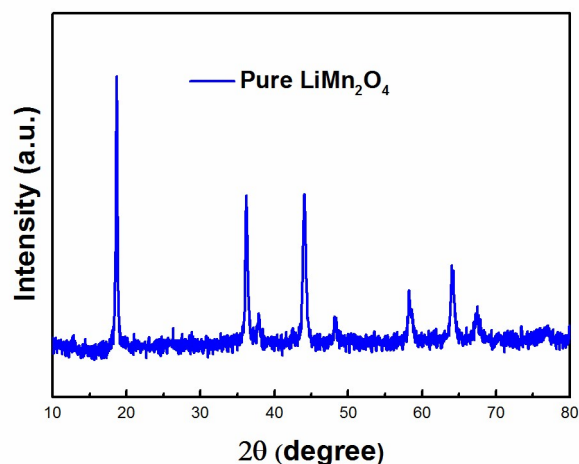

**Fig. S1** XRD pattern of the pure  $\text{LiMn}_2\text{O}_4$  nanoparticles.

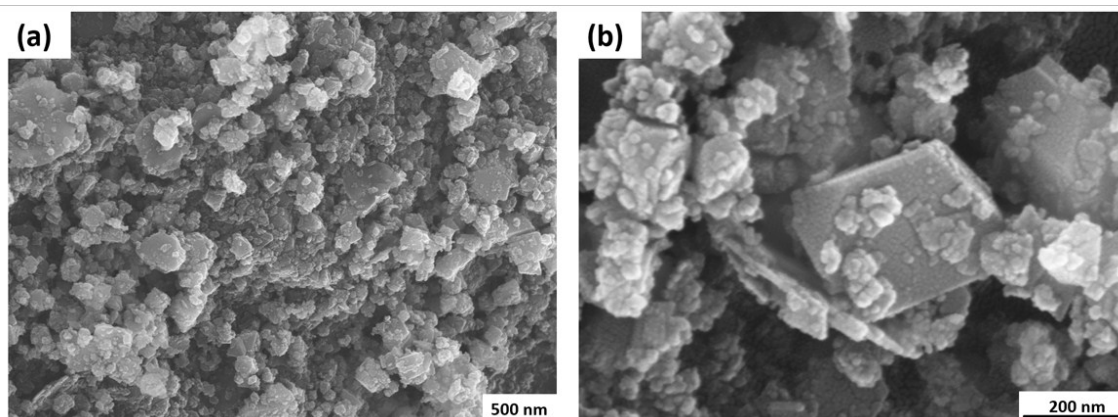

**Fig. S2.** (a and b) SEM images of the pure  $\text{LiMn}_2\text{O}_4$  nanoparticles.

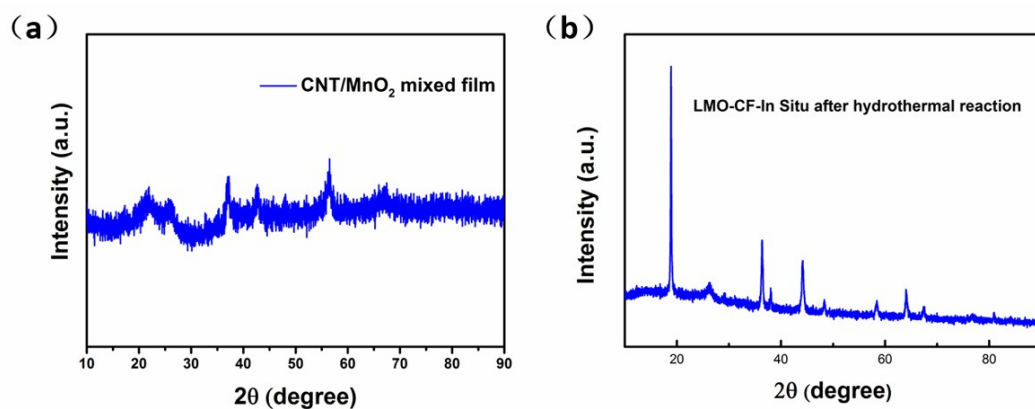

**Fig. S3** (a) XRD pattern of the CNT/MnO<sub>2</sub> composite film; (b) XRD pattern of LMO-CF-In Situ synthesized only after hydrothermal reaction.

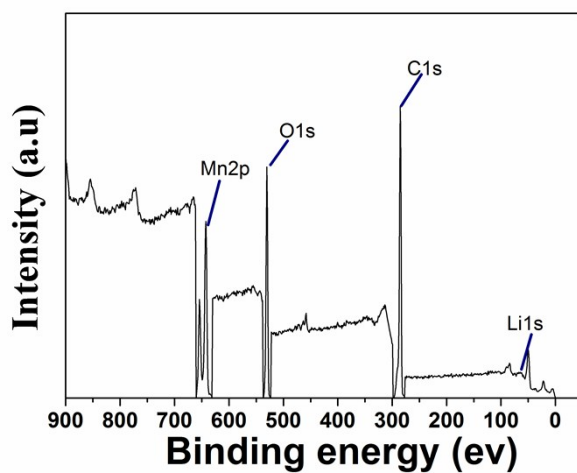

**Fig. S4** XPS pattern of LMO-CF-In Situ.

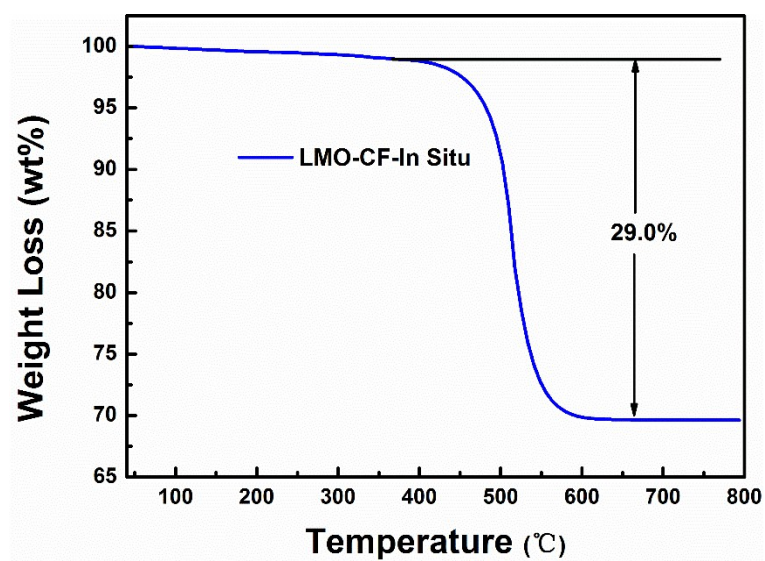

Fig. S5 TGA curve of the LMO-CF-In Situ.

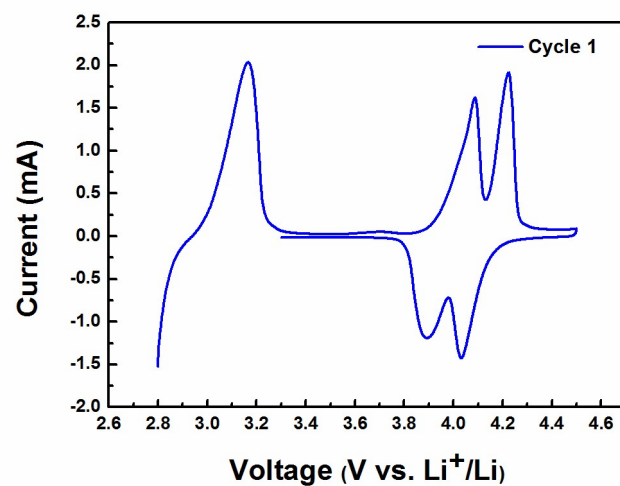

**Fig. S6** The CV curve of the first cycle of LMO-CF-In Situ electrode at a scan rate of 0.1 mV s<sup>-1</sup>.

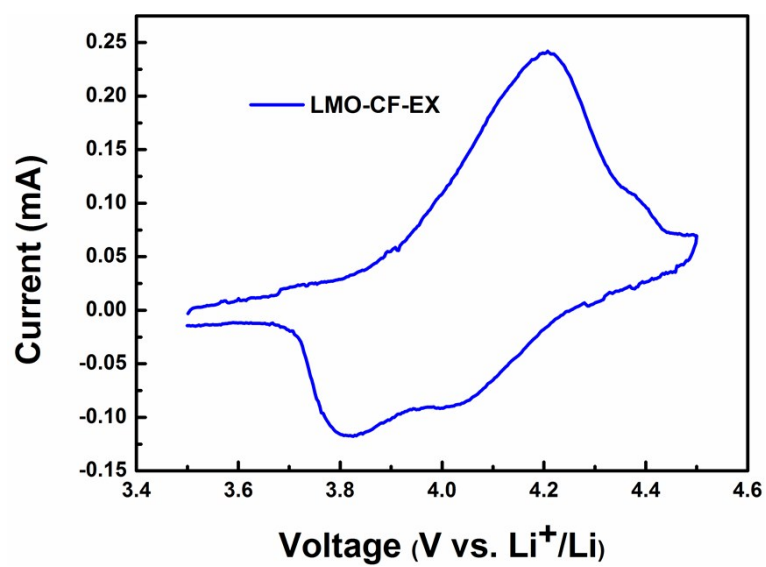

**Fig. S7** CV curve of the LMO-CF-EX electrode at a scan rate of  $0.1 \text{ mV s}^{-1}$ .

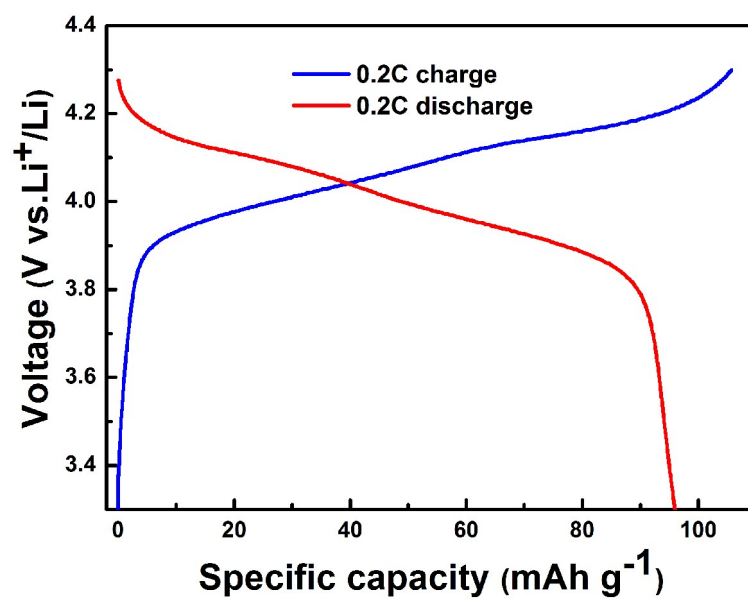

**Fig. S8** Charge and discharge curves of LMO-CF-EX electrode at 0.2 C.
